# Supplementary material
Source: PubMed Central journal article supplement (PMC3965838)
Supplement: mp201341x3.pdf [file mp201341x3.pdf]

**Discordant  
ASD MZ  
Twin-pair**

|   | <b>Gene</b>     | <b>Probe</b> | <b><math>\Delta\beta \leq -0.15</math></b> | <b>Gene</b>     | <b>Probe</b> | <b><math>\Delta\beta \geq 0.15</math></b> |
|---|-----------------|--------------|--------------------------------------------|-----------------|--------------|-------------------------------------------|
| 1 | <i>FLJ42486</i> | cg03734874   | -0.17                                      | <i>HOXA9</i>    | cg27009703   | 0.19                                      |
|   | <i>GLRA3</i>    | cg21094669   | -0.16                                      | <i>HHEX</i>     | cg09721427   | 0.16                                      |
|   | <i>PDE5A</i>    | cg07154408   | -0.16                                      |                 |              |                                           |
|   | <i>SRF</i>      | cg16041611   | -0.16                                      |                 |              |                                           |
|   | <i>IRX2</i>     | cg15433631   | -0.15                                      |                 |              |                                           |
|   | <i>NPTX2</i>    | cg12799895   | -0.15                                      |                 |              |                                           |
| 2 | <i>CTCF</i>     | cg01866162   | -0.36                                      | <i>SYNJ2</i>    | cg13645811   | 0.19                                      |
|   | <i>PXDN</i>     | cg12164282   | -0.19                                      | <i>STYX</i>     | cg03803589   | 0.17                                      |
|   | <i>RPL7</i>     | cg03991326   | -0.17                                      | <i>HNRPD</i>    | cg07964133   | 0.16                                      |
|   | <i>CCL23</i>    | cg14916288   | -0.16                                      | <i>TM6SF1</i>   | cg14696396   | 0.16                                      |
|   |                 |              |                                            | <i>SMS</i>      | cg18624866   | 0.15                                      |
| 3 | <i>C11orf1</i>  | cg04545708   | -0.35                                      | <i>ZDHHC24</i>  | cg08420085   | 0.31                                      |
|   | <i>TACR3</i>    | cg04263186   | -0.17                                      | <i>KCNJ5</i>    | cg11387131   | 0.19                                      |
|   |                 |              |                                            | <i>HCRTR2</i>   | cg13948987   | 0.19                                      |
|   |                 |              |                                            | <i>TCP11</i>    | cg22407458   | 0.18                                      |
|   |                 |              |                                            | <i>CRMP1</i>    | cg03544320   | 0.17                                      |
|   |                 |              |                                            | <i>PHKA2</i>    | cg07314984   | 0.17                                      |
|   |                 |              |                                            | <i>ATP5J</i>    | cg15707568   | 0.16                                      |
|   |                 |              |                                            | <i>SLC30A3</i>  | cg19461344   | 0.16                                      |
| 4 | <i>NDUFB2</i>   | cg12318316   | -0.29                                      | <i>MGC9850</i>  | cg21097640   | 0.43                                      |
|   | <i>PXDN</i>     | cg12164282   | -0.28                                      | <i>SLC38A1</i>  | cg16469386   | 0.35                                      |
|   | <i>ABCC4</i>    | cg15868151   | -0.27                                      | <i>DGKQ</i>     | cg17592292   | 0.30                                      |
|   | <i>RGS7</i>     | cg21303386   | -0.24                                      | <i>CYP46A1</i>  | cg01117627   | 0.28                                      |
|   | <i>FLJ20422</i> | cg20426860   | -0.21                                      | <i>CTNNB1</i>   | cg04180460   | 0.27                                      |
|   | <i>DLX5</i>     | cg02101486   | -0.20                                      | <i>JOSD1</i>    | cg26380756   | 0.26                                      |
|   | <i>AGMAT</i>    | cg11706911   | -0.19                                      | <i>FGFR1OP</i>  | cg25395108   | 0.25                                      |
|   | <i>HOXB7</i>    | cg06493080   | -0.19                                      | <i>UBE2Q1</i>   | cg09311052   | 0.24                                      |
|   | <i>HECA</i>     | cg24349555   | -0.19                                      | <i>PSMD2</i>    | cg19188060   | 0.24                                      |
|   | <i>RTN4RL2</i>  | cg17349753   | -0.18                                      | <i>CD24</i>     | cg23654549   | 0.24                                      |
|   | <i>NMNAT3</i>   | cg01724150   | -0.17                                      | <i>SACM1L</i>   | cg22986271   | 0.23                                      |
|   | <i>C6orf89</i>  | cg20598389   | -0.17                                      | <i>KCNQ1</i>    | cg17575811   | 0.23                                      |
|   | <i>SLC39A8</i>  | cg18277508   | -0.16                                      | <i>CRLF1</i>    | cg10810921   | 0.23                                      |
|   | <i>ZNF502</i>   | cg08210616   | -0.16                                      | <i>KCNQ3</i>    | cg27016990   | 0.22                                      |
|   | <i>IMPA1</i>    | cg16746631   | -0.16                                      | <i>GABBR1</i>   | cg24847163   | 0.22                                      |
|   | <i>BOP1</i>     | cg11375622   | -0.16                                      | <i>HOXA9</i>    | cg27009703   | 0.21                                      |
|   | <i>ZC3H10</i>   | cg05347567   | -0.16                                      | <i>SMG1</i>     | cg07295034   | 0.21                                      |
|   | <i>C19orf6</i>  | cg23792364   | -0.16                                      | <i>CPZ</i>      | cg03292388   | 0.21                                      |
|   | <i>ACCN2</i>    | cg23126949   | -0.16                                      | <i>RASGRF2</i>  | cg09952204   | 0.21                                      |
|   | <i>STARD13</i>  | cg26049501   | -0.16                                      | <i>STOML1</i>   | cg00441382   | 0.20                                      |
|   |                 |              |                                            | <i>HS3ST3A1</i> | cg07480567   | 0.20                                      |
|   |                 |              |                                            | <i>BAHD1</i>    | cg07114024   | 0.19                                      |
|   |                 |              |                                            | <i>POLS</i>     | cg20149766   | 0.19                                      |
|   |                 |              |                                            | <i>SLC30A2</i>  | cg05674944   | 0.19                                      |
|   |                 |              |                                            | <i>ALDOB</i>    | cg26181372   | 0.18                                      |
|   |                 |              |                                            | <i>HR</i>       | cg12748258   | 0.18                                      |
|   |                 |              |                                            | <i>FLJ30934</i> | cg19018097   | 0.18                                      |
|   |                 |              |                                            | <i>WT1</i>      | cg15107670   | 0.18                                      |
|   |                 |              |                                            | <i>HIAT1</i>    | cg02161046   | 0.18                                      |
|   |                 |              |                                            | <i>ITPK1</i>    | cg16628119   | 0.18                                      |
|   |                 |              |                                            | <i>VAMP5</i>    | cg11108890   | 0.17                                      |

|   |                  |            |       |                 |            |      |
|---|------------------|------------|-------|-----------------|------------|------|
|   |                  |            |       | <i>C21orf7</i>  | cg22074666 | 0.17 |
|   |                  |            |       | <i>DNMT3B</i>   | cg16523653 | 0.17 |
|   |                  |            |       | <i>GRB10</i>    | cg06790324 | 0.17 |
|   |                  |            |       | <i>MARCH7</i>   | cg02479196 | 0.17 |
|   |                  |            |       | <i>XPR1</i>     | cg16394138 | 0.16 |
|   |                  |            |       | <i>ATP5S</i>    | cg15383574 | 0.16 |
|   |                  |            |       | <i>ATP13A4</i>  | cg23159337 | 0.16 |
|   |                  |            |       | <i>AMDHD2</i>   | cg09548179 | 0.16 |
|   |                  |            |       | <i>RARB</i>     | cg02499249 | 0.16 |
|   |                  |            |       | <i>CHEK2</i>    | cg16189954 | 0.16 |
|   |                  |            |       | <i>PCTK3</i>    | cg07713493 | 0.16 |
|   |                  |            |       | <i>NUP43</i>    | cg26675382 | 0.16 |
|   |                  |            |       | <i>HOXA9</i>    | cg26521404 | 0.16 |
|   |                  |            |       | <i>LOC51315</i> | cg26602920 | 0.15 |
|   |                  |            |       | <i>SLC6A15</i>  | cg03064067 | 0.15 |
|   |                  |            |       | <i>MGC26816</i> | cg08431931 | 0.15 |
|   |                  |            |       | <i>FCRL1</i>    | cg09340639 | 0.15 |
|   |                  |            |       | <i>LOXL1</i>    | cg03682712 | 0.15 |
| 5 | <i>MATN3</i>     | cg21177096 | -0.17 | <i>FLJ25422</i> | cg24237439 | 0.18 |
|   | <i>NKX6-2</i>    | cg08441806 | -0.17 | <i>MRPL12</i>   | cg15214092 | 0.17 |
|   | <i>ERCC2</i>     | cg04878842 | -0.17 | <i>ITGB7</i>    | cg08374799 | 0.16 |
|   | <i>CSMD2</i>     | cg19228118 | -0.16 | <i>SUSD1</i>    | cg14862827 | 0.15 |
|   | <i>KIF2C</i>     | cg03907454 | -0.16 | <i>REPS2</i>    | cg20855303 | 0.15 |
|   | <i>SURF4</i>     | cg22244122 | -0.16 | <i>INSIG2</i>   | cg04195527 | 0.15 |
| 6 | <i>CYSLTR2</i>   | cg18236297 | -0.34 | <i>FLJ20422</i> | cg20426860 | 0.27 |
|   | <i>PTRH2</i>     | cg08793459 | -0.25 | <i>EIF3S6</i>   | cg06987504 | 0.24 |
|   | <i>ADPN</i>      | cg23653187 | -0.25 | <i>TTC1</i>     | cg01222684 | 0.24 |
|   | <i>ABCC12</i>    | cg14074641 | -0.24 | <i>GRIA4</i>    | cg09980522 | 0.23 |
|   | <i>C11orf1</i>   | cg04545708 | -0.23 | <i>C20orf38</i> | cg25125453 | 0.22 |
|   | <i>LRP2BP</i>    | cg06521761 | -0.22 | <i>IGF2BP3</i>  | cg02860543 | 0.22 |
|   | <i>CD209</i>     | cg07608333 | -0.21 | <i>ACAT2</i>    | cg15298323 | 0.21 |
|   | <i>HS6ST3</i>    | cg17183991 | -0.21 | <i>TARDBP</i>   | cg00692549 | 0.21 |
|   | <i>TTLL1</i>     | cg09047884 | -0.20 | <i>TRIM17</i>   | cg23540518 | 0.21 |
|   | <i>MMP10</i>     | cg00347729 | -0.20 | <i>EFHA1</i>    | cg08163803 | 0.20 |
|   | <i>MGC16186</i>  | cg12064929 | -0.20 | <i>CCNT2</i>    | cg17865752 | 0.20 |
|   | <i>ABCB11</i>    | cg20118424 | -0.19 | <i>ATP2C1</i>   | cg09134747 | 0.20 |
|   | <i>REPIN1</i>    | cg21784940 | -0.19 | <i>C6orf105</i> | cg14178895 | 0.19 |
|   | <i>YES1</i>      | cg14671488 | -0.19 | <i>C10orf63</i> | cg08847038 | 0.19 |
|   | <i>C4orf6</i>    | cg11237738 | -0.18 | <i>BCDIN3</i>   | cg17607973 | 0.19 |
|   | <i>FSBP</i>      | cg26323655 | -0.18 | <i>COBLL1</i>   | cg02537909 | 0.18 |
|   | <i>CYP4F2</i>    | cg05358291 | -0.18 | <i>SP100</i>    | cg05091653 | 0.18 |
|   | <i>CIRH1A</i>    | cg17120423 | -0.17 | <i>TCN1</i>     | cg00187686 | 0.18 |
|   | <i>GUCY1A3</i>   | cg02210887 | -0.17 | <i>SPATA12</i>  | cg04563996 | 0.18 |
|   | <i>SCEL</i>      | cg21063899 | -0.17 | <i>PPBPL2</i>   | cg26866325 | 0.18 |
|   | <i>GIMAP4</i>    | cg00323915 | -0.17 | <i>MET</i>      | cg25299676 | 0.18 |
|   | <i>ALS2CR7</i>   | cg19654437 | -0.17 | <i>EI24</i>     | cg26606064 | 0.17 |
|   | <i>ALDH3B2</i>   | cg14353201 | -0.17 | <i>HIST1H4E</i> | cg16706631 | 0.17 |
|   | <i>PPAP2B</i>    | cg16505550 | -0.17 | <i>DYSF</i>     | cg15491567 | 0.17 |
|   | <i>C14orf119</i> | cg16141690 | -0.17 | <i>SFRS2</i>    | cg00953277 | 0.17 |
|   | <i>FLJ32926</i>  | cg11521325 | -0.16 | <i>PAM</i>      | cg21596317 | 0.17 |
|   | <i>IGSF2</i>     | cg08920071 | -0.16 | <i>PIGB</i>     | cg27638672 | 0.17 |
|   | <i>FLJ20160</i>  | cg15998761 | -0.16 | <i>KIAA0372</i> | cg09244244 | 0.17 |
|   | <i>KIAA1267</i>  | cg19832721 | -0.16 | <i>DMTF1</i>    | cg19861697 | 0.17 |

|                |            |       |                  |            |      |
|----------------|------------|-------|------------------|------------|------|
| <i>CXCL11</i>  | cg08046471 | -0.16 | <i>EVC</i>       | cg21210758 | 0.17 |
| <i>AGA</i>     | cg00398048 | -0.16 | <i>ASPM</i>      | cg19350340 | 0.17 |
| <i>CTLA4</i>   | cg08460026 | -0.16 | <i>FMO4</i>      | cg21183846 | 0.17 |
| <i>JPH1</i>    | cg23599843 | -0.15 | <i>ZNF235</i>    | cg27541515 | 0.16 |
| <i>CDO1</i>    | cg07644368 | -0.15 | <i>SNRPD2</i>    | cg24254206 | 0.16 |
| <i>SULT1C2</i> | cg17966192 | -0.15 | <i>ATP5J</i>     | cg25085950 | 0.16 |
| <i>CD3E</i>    | cg24612198 | -0.15 | <i>CDKN2A</i>    | cg26673943 | 0.16 |
| <i>ITGA3</i>   | cg14737977 | -0.15 | <i>FGF8</i>      | cg16584573 | 0.16 |
| <i>LRRC50</i>  | cg08965527 | -0.15 | <i>ITLN1</i>     | cg21476940 | 0.16 |
|                |            |       | <i>TEP1</i>      | cg16920242 | 0.16 |
|                |            |       | <i>HIST2H2AC</i> | cg03086563 | 0.16 |
|                |            |       | <i>PLEKHO1</i>   | cg00095674 | 0.16 |
|                |            |       | <i>GFPT1</i>     | cg08646988 | 0.16 |
|                |            |       | <i>C1orf9</i>    | cg20525378 | 0.16 |
|                |            |       | <i>TGFB2</i>     | cg11976166 | 0.16 |
|                |            |       | <i>NR1H2</i>     | cg00336605 | 0.16 |
|                |            |       | <i>TMEM128</i>   | cg13296371 | 0.16 |
|                |            |       | <i>OR10H2</i>    | cg12513379 | 0.16 |
|                |            |       | <i>ILF2</i>      | cg09929564 | 0.16 |
|                |            |       | <i>HIST1H1E</i>  | cg15519208 | 0.15 |
|                |            |       | <i>MOSPD2</i>    | cg19740287 | 0.15 |
|                |            |       | <i>MGC41945</i>  | cg05000446 | 0.15 |
|                |            |       | <i>VPS18</i>     | cg03643709 | 0.15 |
|                |            |       | <i>CXorf42</i>   | cg24038764 | 0.15 |
