# Supplementary material
Source: PubMed Central journal article supplement (PMC3965838)
Supplement: mp201341x4.pdf [file mp201341x4.pdf]

a

| Rank | ProbelD    | Gene                  | Chromosome | Position  | Mean $\Delta\beta$ | p-value  |
|------|------------|-----------------------|------------|-----------|--------------------|----------|
| 1    | cg15089487 | <i>THAP10</i>         | 15         | 68972306  | 0.04               | 1.30E-03 |
| 2    | cg11324740 | <i>OIP5</i>           | 15         | 39412085  | 0.03               | 6.05E-04 |
| 3    | cg15240064 | <i>ZNF12</i>          | 7          | 6713362   | 0.04               | 2.04E-03 |
| 4    | cg01353347 | <i>IRAK1</i>          | X          | 152938352 | -0.03              | 6.67E-04 |
| 5    | cg22226839 | <i>ATP2B4</i>         | 1          | 201862674 | -0.04              | 5.25E-03 |
| 6    | cg21241823 | <i>PRDM15</i>         | 21         | 42173093  | -0.04              | 4.54E-03 |
| 7    | cg15940569 | <i>GABRB3</i>         | 15         | 24570449  | 0.04               | 4.25E-03 |
| 8    | cg11909310 | <i>DKFZP686A10121</i> | 7          | 89813722  | 0.06               | 7.30E-03 |
| 9    | cg12736438 | <i>RAB20</i>          | 13         | 110012458 | -0.03              | 1.74E-03 |
| 10   | cg01041367 | <i>TMEM70</i>         | 8          | 75050634  | 0.04               | 5.91E-03 |
| 11   | cg04244987 | <i>NCKIPSD</i>        | 3          | 48698642  | -0.03              | 4.10E-03 |
| 12   | cg18349258 | <i>SMEK2</i>          | 2          | 55697707  | 0.04               | 6.00E-03 |
| 13   | cg11492856 | <i>CAPN7</i>          | 3          | 15221591  | -0.03              | 3.55E-03 |
| 14   | cg15995002 | <i>RAD54B</i>         | 8          | 95556400  | 0.03               | 3.34E-03 |
| 15   | cg01798443 | <i>RPSA</i>           | 3          | 39422895  | 0.03               | 4.43E-03 |
| 16   | cg24034289 | <i>SCAMP3</i>         | 1          | 153498968 | -0.03              | 3.62E-03 |
| 17   | cg25948180 | <i>PDHX</i>           | 11         | 34893357  | 0.04               | 8.09E-03 |
| 18   | cg19837131 | <i>PIK3C3</i>         | 18         | 37789059  | -0.05              | 1.01E-02 |
| 19   | cg11814446 | <i>LEMD3</i>          | 12         | 63849263  | 0.03               | 5.79E-03 |
| 20   | cg27537561 | <i>VDR</i>            | 12         | 46584923  | -0.04              | 8.87E-03 |
| 21   | cg01160766 | <i>RPL38</i>          | 17         | 69711466  | -0.03              | 7.81E-03 |
| 22   | cg18855178 | <i>PCSK4</i>          | 19         | 1441194   | 0.03               | 4.51E-03 |
| 23   | cg08785133 | <i>PORCN</i>          | X          | 48252137  | -0.03              | 4.24E-03 |
| 24   | cg13240311 | <i>PKIG</i>           | 20         | 42594209  | -0.03              | 8.51E-03 |
| 25   | cg20663980 | <i>CDX4</i>           | X          | 72583795  | 0.03               | 9.03E-04 |
| 26   | cg27198824 | <i>AFF2</i>           | X          | 147390419 | -0.03              | 9.52E-03 |
| 27   | cg05857825 | <i>MAPRE1</i>         | 20         | 30871874  | -0.03              | 6.28E-03 |
| 28   | cg21509097 | <i>LYPLA3</i>         | 16         | 66837114  | -0.03              | 7.45E-03 |
| 29   | cg02345317 | <i>NLGN3</i>          | X          | 70281268  | -0.03              | 1.27E-04 |
| 30   | cg16468910 | <i>SNX4</i>           | 3          | 126721481 | 0.03               | 1.10E-02 |
| 31   | cg14751914 | <i>SMAD7</i>          | 18         | 44731402  | -0.04              | 1.46E-02 |
| 32   | cg25095380 | <i>PRDM5</i>          | 4          | 122062657 | 0.03               | 1.29E-02 |
| 33   | cg04856685 | <i>MAP4</i>           | 3          | 48105803  | -0.03              | 5.69E-03 |
| 34   | cg19695867 | <i>WDR47</i>          | 1          | 109386913 | 0.03               | 9.43E-03 |
| 35   | cg13192155 | <i>ERAS</i>           | X          | 48570887  | -0.03              | 9.45E-03 |
| 36   | cg11223864 | <i>GNB2</i>           | 7          | 100109259 | -0.03              | 1.16E-02 |
| 37   | cg17150465 | <i>SCRIB</i>          | 8          | 144969546 | -0.03              | 1.18E-03 |
| 38   | cg05471775 | <i>HIST1H4B</i>       | 6          | 26135510  | -0.03              | 9.47E-03 |
| 39   | cg04959788 | <i>PTCH2</i>          | 1          | 45081216  | -0.03              | 5.76E-03 |
| 40   | cg17758148 | <i>JMY</i>            | 5          | 78609397  | 0.03               | 1.86E-03 |
| 41   | cg14272175 | <i>PXK</i>            | 3          | 58294000  | 0.03               | 7.48E-03 |
| 42   | cg26757053 | <i>LYPLAL1</i>        | 1          | 217413644 | 0.04               | 1.75E-02 |
| 43   | cg00620629 | <i>C6orf113</i>       | 6          | 117096644 | 0.03               | 1.27E-02 |
| 44   | cg07118638 | <i>THEX1</i>          | 8          | 8897611   | 0.03               | 9.99E-03 |
| 45   | cg19724470 | <i>CD274</i>          | 9          | 5440936   | 0.03               | 1.71E-02 |
| 46   | cg05158538 | <i>PPARGC1A</i>       | 4          | 23500584  | 0.03               | 1.17E-02 |
| 47   | cg26365553 | <i>MADD</i>           | 11         | 47247189  | -0.02              | 7.85E-04 |
| 48   | cg13585240 | <i>ARIH2</i>          | 3          | 48934379  | 0.02               | 1.65E-03 |
| 49   | cg04156850 | <i>GRB2</i>           | 17         | 70914167  | -0.03              | 7.12E-03 |
| 50   | cg24130043 | <i>ZNF197</i>         | 3          | 44641366  | -0.02              | 3.52E-03 |

**b**

| <b>Rank</b> | <b>ProbelD</b> | <b>Gene</b>     | <b>Chromosome</b> | <b>Position</b> | <b>Mean <math>\Delta\beta</math></b> | <b>p-value</b> |
|-------------|----------------|-----------------|-------------------|-----------------|--------------------------------------|----------------|
| 1           | cg16746631     | <i>IMPA1</i>    | 8                 | 82760695        | -0.04                                | 4.72E-04       |
| 2           | cg04624659     | <i>SPAG17</i>   | 1                 | 118529340       | -0.04                                | 7.51E-04       |
| 3           | cg27372468     | <i>SLC22A4</i>  | 5                 | 131658111       | 0.04                                 | 1.54E-04       |
| 4           | cg16208448     | <i>TPP2</i>     | 13                | 102047992       | -0.06                                | 2.79E-03       |
| 5           | cg18215716     | <i>TMEM111</i>  | 3                 | 10004246        | 0.04                                 | 2.00E-03       |
| 6           | cg05107152     | <i>KLC4</i>     | 6                 | 43134752        | 0.04                                 | 2.66E-03       |
| 7           | cg04062907     | <i>ANAPC7</i>   | 12                | 109325928       | 0.03                                 | 7.55E-06       |
| 8           | cg12930602     | <i>DIPA</i>     | 11                | 65414471        | 0.04                                 | 3.01E-03       |
| 9           | cg24110050     | <i>TCTEX1D1</i> | 1                 | 66990441        | -0.04                                | 3.19E-03       |
| 10          | cg13700897     | <i>RSPO2</i>    | 8                 | 109165240       | 0.03                                 | 1.49E-03       |
| 11          | cg02210123     | <i>RHOJ</i>     | 14                | 62740588        | -0.04                                | 3.46E-03       |
| 12          | cg02597128     | <i>CXorf41</i>  | X                 | 106336479       | -0.05                                | 5.71E-03       |
| 13          | cg16082125     | <i>USP11</i>    | X                 | 46977504        | -0.04                                | 3.32E-03       |
| 14          | cg08463061     | <i>RND3</i>     | 2                 | 151052578       | -0.06                                | 6.38E-03       |
| 15          | cg16541031     | <i>IRF7</i>     | 11                | 605519          | -0.03                                | 2.36E-04       |
| 16          | cg11738543     | <i>SOCS2</i>    | 12                | 92491356        | -0.03                                | 2.99E-03       |
| 17          | cg09665351     | <i>APXL</i>     | X                 | 9715283         | 0.04                                 | 5.83E-03       |
| 18          | cg16290693     | <i>SPSB1</i>    | 1                 | 9275539         | -0.05                                | 6.51E-03       |
| 19          | cg10159529     | <i>IL5RA</i>    | 3                 | 3127530         | 0.03                                 | 1.87E-03       |
| 20          | cg25909811     | <i>KDELR2</i>   | 7                 | 6489778         | 0.03                                 | 1.18E-03       |
| 21          | cg01808130     | <i>SLC35B3</i>  | 6                 | 8380205         | -0.04                                | 7.02E-03       |
| 22          | cg14155482     | <i>PIP5K1A</i>  | 1                 | 149437706       | 0.03                                 | 5.21E-03       |
| 23          | cg22492966     | <i>JMJD1C</i>   | 10                | 64698935        | 0.04                                 | 7.92E-03       |
| 24          | cg08142684     | <i>TCP1</i>     | 6                 | 160129858       | -0.04                                | 6.12E-03       |
| 25          | cg10274830     | <i>C6orf96</i>  | 6                 | 151815702       | -0.05                                | 9.03E-03       |
| 26          | cg27198824     | <i>AFF2</i>     | X                 | 147390419       | -0.03                                | 4.78E-03       |
| 27          | cg05459203     | <i>NUDCD3</i>   | 7                 | 44497199        | -0.04                                | 9.22E-03       |
| 28          | cg27631817     | <i>OFCC1</i>    | 6                 | 10168924        | -0.04                                | 8.12E-03       |
| 29          | cg23828595     | <i>PRKG1</i>    | 10                | 52503616        | -0.03                                | 5.73E-03       |
| 30          | cg18506672     | <i>SNURF</i>    | 15                | 22751346        | -0.03                                | 2.74E-03       |
| 31          | cg07623294     | <i>ELAVL2</i>   | 9                 | 23816507        | -0.03                                | 5.71E-03       |
| 32          | cg13181019     | <i>MPP7</i>     | 10                | 28611588        | 0.03                                 | 4.99E-04       |
| 33          | cg06618866     | <i>TLR2</i>     | 4                 | 154824537       | -0.03                                | 6.71E-03       |
| 34          | cg23653712     | <i>SGCB</i>     | 4                 | 52599136        | -0.03                                | 7.65E-04       |
| 35          | cg17746675     | <i>C3orf31</i>  | 3                 | 11863297        | 0.03                                 | 7.97E-03       |
| 36          | cg02200584     | <i>PDGFC</i>    | 4                 | 158111996       | -0.03                                | 3.43E-03       |
| 37          | cg12542604     | <i>ANKS1A</i>   | 6                 | 34964682        | 0.04                                 | 1.09E-02       |
| 38          | cg02171545     | <i>SNRPN</i>    | 15                | 22644459        | -0.04                                | 1.32E-02       |
| 39          | cg14967972     | <i>PANK1</i>    | 10                | 91395245        | -0.04                                | 1.38E-02       |
| 40          | cg17412258     | <i>DLK1</i>     | 14                | 100262770       | -0.03                                | 3.27E-03       |
| 41          | cg02712845     | <i>DPAGT1</i>   | 11                | 118478248       | -0.05                                | 1.43E-02       |
| 42          | cg20902737     | <i>EFTUD2</i>   | 17                | 40331968        | 0.03                                 | 3.53E-03       |
| 43          | cg11692477     | <i>SLC40A1</i>  | 2                 | 190153722       | -0.03                                | 3.62E-03       |
| 44          | cg00468146     | <i>ID4</i>      | 6                 | 19946190        | -0.03                                | 8.41E-03       |
| 45          | cg09053680     | <i>UTF1</i>     | 10                | 134894104       | -0.03                                | 3.14E-03       |
| 46          | cg06905514     | <i>CAMK2B</i>   | 7                 | 44331466        | -0.03                                | 7.05E-03       |
| 47          | cg24921089     | <i>AMPD3</i>    | 11                | 10429416        | -0.03                                | 1.02E-02       |
| 48          | cg03863149     | <i>ZNF644</i>   | 1                 | 91260104        | -0.04                                | 1.36E-02       |
| 49          | cg15494458     | <i>BPI</i>      | 20                | 36364926        | 0.03                                 | 9.51E-03       |
| 50          | cg26491425     | <i>RHOV</i>     | 15                | 38953924        | 0.03                                 | 6.50E-03       |

## C

| Rank | ProbelD    | Gene     | Chromosome | Position  | Mean $\Delta\beta$ | p-value  |
|------|------------|----------|------------|-----------|--------------------|----------|
| 1    | cg16399745 | CNAP1    | 12         | 6474300   | -0.06              | 1.17E-03 |
| 2    | cg06340713 | CHM      | X          | 85190083  | 0.05               | 5.03E-04 |
| 3    | cg12237946 | PGBD4    | 15         | 32181668  | -0.07              | 2.73E-03 |
| 4    | cg02245418 | ZNF364   | 1          | 144321032 | 0.04               | 9.45E-04 |
| 5    | cg25040783 | APPL     | 3          | 57236346  | 0.04               | 1.53E-03 |
| 6    | cg05881762 | UBE3A    | 15         | 23235942  | 0.04               | 3.38E-03 |
| 7    | cg04578090 | PROCA1   | 17         | 24063650  | -0.05              | 5.86E-03 |
| 8    | cg22947000 | BCMO1    | 16         | 79829782  | 0.06               | 6.99E-03 |
| 9    | cg24371383 | CEP55    | 10         | 95246094  | 0.04               | 2.90E-03 |
| 10   | cg22232206 | SRF      | 6          | 43246163  | -0.04              | 1.75E-03 |
| 11   | cg24073051 | CDV3     | 3          | 134774669 | 0.03               | 2.07E-03 |
| 12   | cg01485998 | FLJ12505 | 1          | 211190520 | -0.04              | 4.66E-03 |
| 13   | cg00662775 | TCEAL4   | X          | 102727091 | -0.07              | 8.90E-03 |
| 14   | cg23054437 | MOSC2    | 1          | 218987929 | -0.05              | 7.67E-03 |
| 15   | cg00901652 | SH2BP1   | 11         | 10729010  | -0.04              | 7.86E-03 |
| 16   | cg23839680 | CCT6A    | 7          | 56085732  | -0.06              | 9.63E-03 |
| 17   | cg09580336 | ATP1A1   | 1          | 116716645 | 0.04               | 5.86E-03 |
| 18   | cg14196790 | SLC22A5  | 5          | 131732934 | -0.04              | 5.69E-03 |
| 19   | cg04902405 | ZC3H11A  | 1          | 202035140 | 0.04               | 9.01E-03 |
| 20   | cg11392765 | BAPX1    | 4          | 13155771  | -0.04              | 6.32E-03 |
| 21   | cg05419984 | PIGX     | 3          | 197922860 | -0.04              | 9.89E-03 |
| 22   | cg02620013 | MLNR     | 13         | 48692682  | -0.03              | 4.58E-03 |
| 23   | cg20649047 | NUMB     | 14         | 72994914  | -0.04              | 7.70E-03 |
| 24   | cg00325491 | FN5      | 11         | 92925818  | 0.03               | 2.76E-03 |
| 25   | cg26536259 | BMP2     | 20         | 6696006   | -0.03              | 3.71E-03 |
| 26   | cg04145477 | QRSL1    | 6          | 107184322 | -0.03              | 1.30E-03 |
| 27   | cg13306784 | INPP5E   | 9          | 138454309 | -0.04              | 1.05E-02 |
| 28   | cg10521267 | ZNF684   | 1          | 40769714  | 0.04               | 1.15E-02 |
| 29   | cg01909833 | BRD2     | 6          | 33045245  | -0.03              | 6.18E-03 |
| 30   | cg27170298 | BCS1L    | 2          | 219233031 | -0.04              | 1.30E-02 |
| 31   | cg12073779 | CRYGD    | 2          | 208697714 | -0.03              | 9.22E-03 |
| 32   | cg05944800 | INSIG2   | 2          | 118562016 | -0.03              | 7.09E-03 |
| 33   | cg26083396 | IMPDH1   | 7          | 127837121 | -0.04              | 1.47E-02 |
| 34   | cg05062178 | ITGB5    | 3          | 126087937 | 0.03               | 4.67E-03 |
| 35   | cg11395610 | RAB28    | 4          | 13094336  | -0.03              | 8.61E-03 |
| 36   | cg04422896 | C12orf43 | 12         | 119938652 | -0.03              | 8.63E-03 |
| 37   | cg26675382 | NUP43    | 6          | 150109539 | 0.05               | 1.80E-02 |
| 38   | cg05768141 | KCNJ10   | 1          | 158306471 | 0.03               | 1.22E-02 |
| 39   | cg12179176 | SNX19    | 11         | 130291765 | 0.03               | 1.09E-02 |
| 40   | cg25921910 | CDC73    | 1          | 191357280 | 0.04               | 1.65E-02 |
| 41   | cg17572791 | HAX1     | 1          | 152511809 | -0.03              | 1.29E-02 |
| 42   | cg04587910 | XLF      | 2          | 219733988 | 0.03               | 4.37E-03 |
| 43   | cg19848683 | EVI1     | 3          | 170346742 | -0.03              | 4.47E-03 |
| 44   | cg24456340 | GNGT2    | 17         | 44641482  | -0.03              | 3.14E-03 |
| 45   | cg08513100 | UBE2B    | 5          | 133734621 | -0.03              | 1.37E-02 |
| 46   | cg15182360 | PCDH20   | 13         | 60887738  | -0.04              | 1.92E-02 |
| 47   | cg20716209 | STAT3    | 17         | 37794796  | -0.03              | 1.23E-02 |
| 48   | cg12917695 | HSPC268  | 7          | 138675699 | -0.03              | 8.90E-03 |
| 49   | cg23062876 | DBT      | 1          | 100488055 | -0.03              | 1.21E-02 |
| 50   | cg14800883 | ARPC4    | 3          | 9809004   | 0.05               | 2.18E-02 |
