# Supplementary material
Source: PubMed Central journal article supplement (PMC3965838)

### PIK3C3

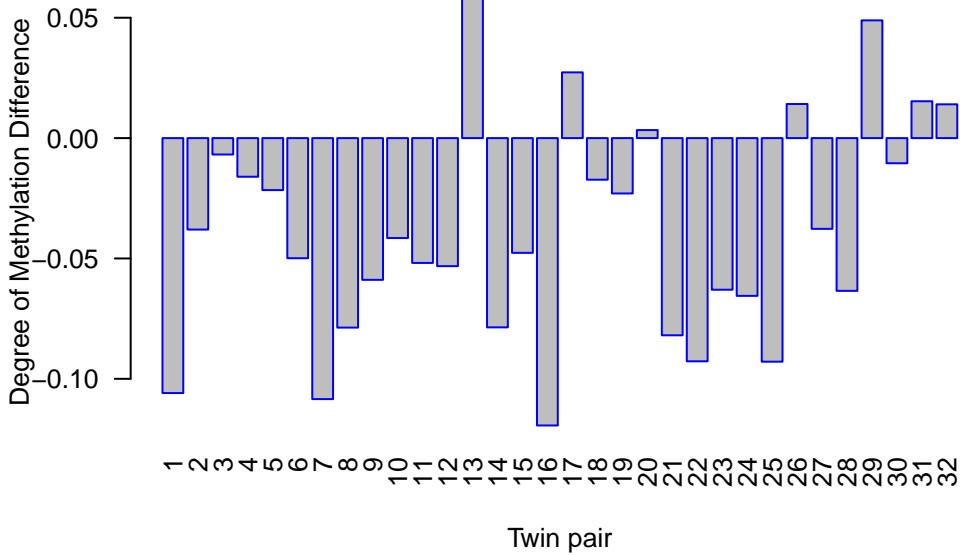

### SMEK2

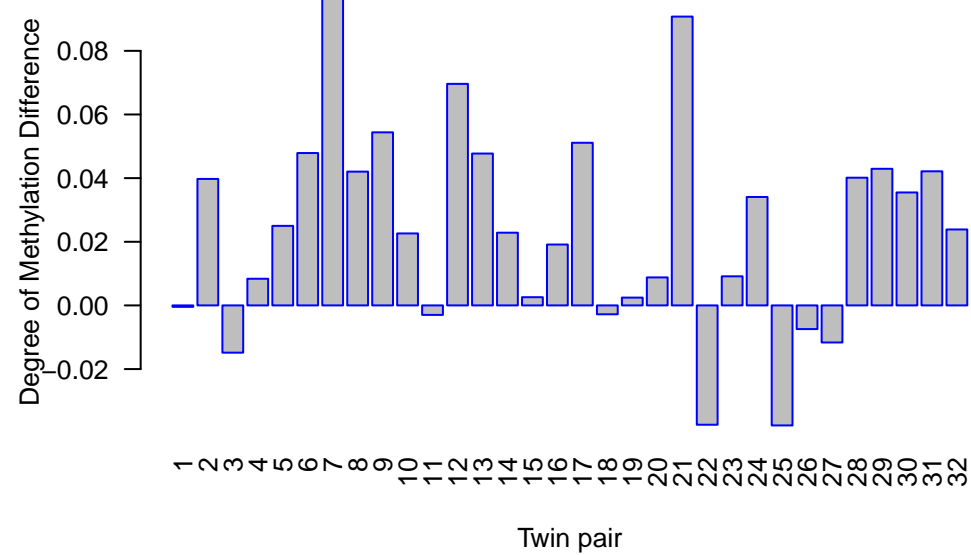

### SCO1

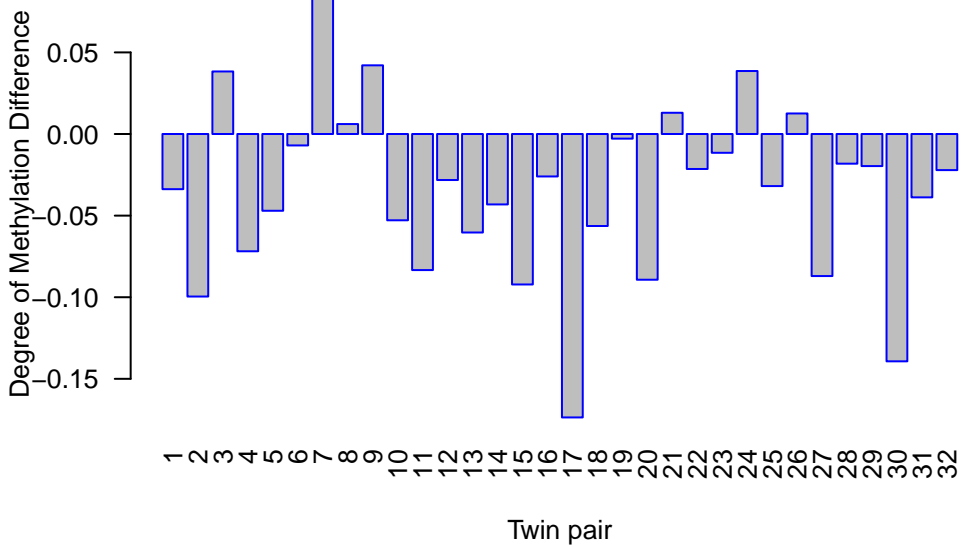

### AFF2

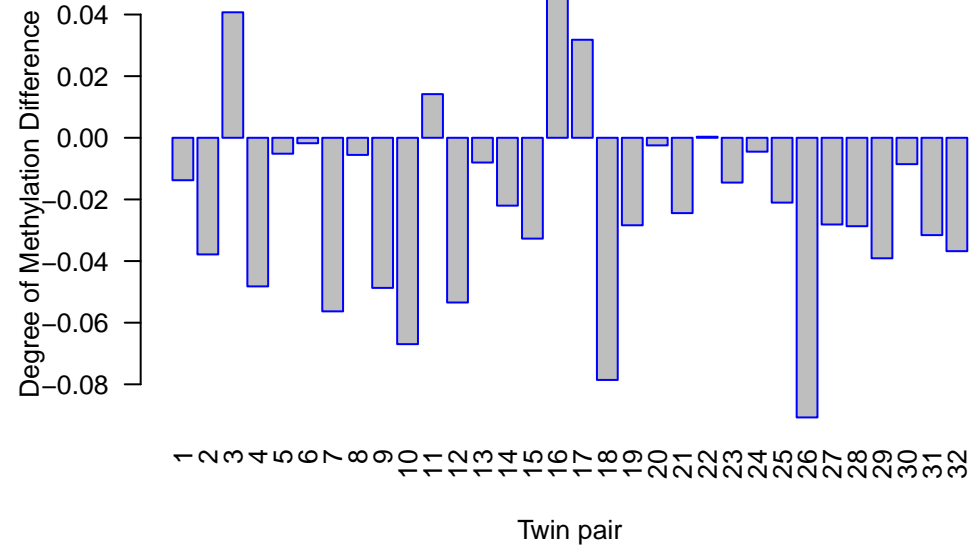

Supplement: mp201341x19.pdf [file mp201341x19.pdf]
