# Supplementary material
Source: PubMed Central journal article supplement (PMC3965838)

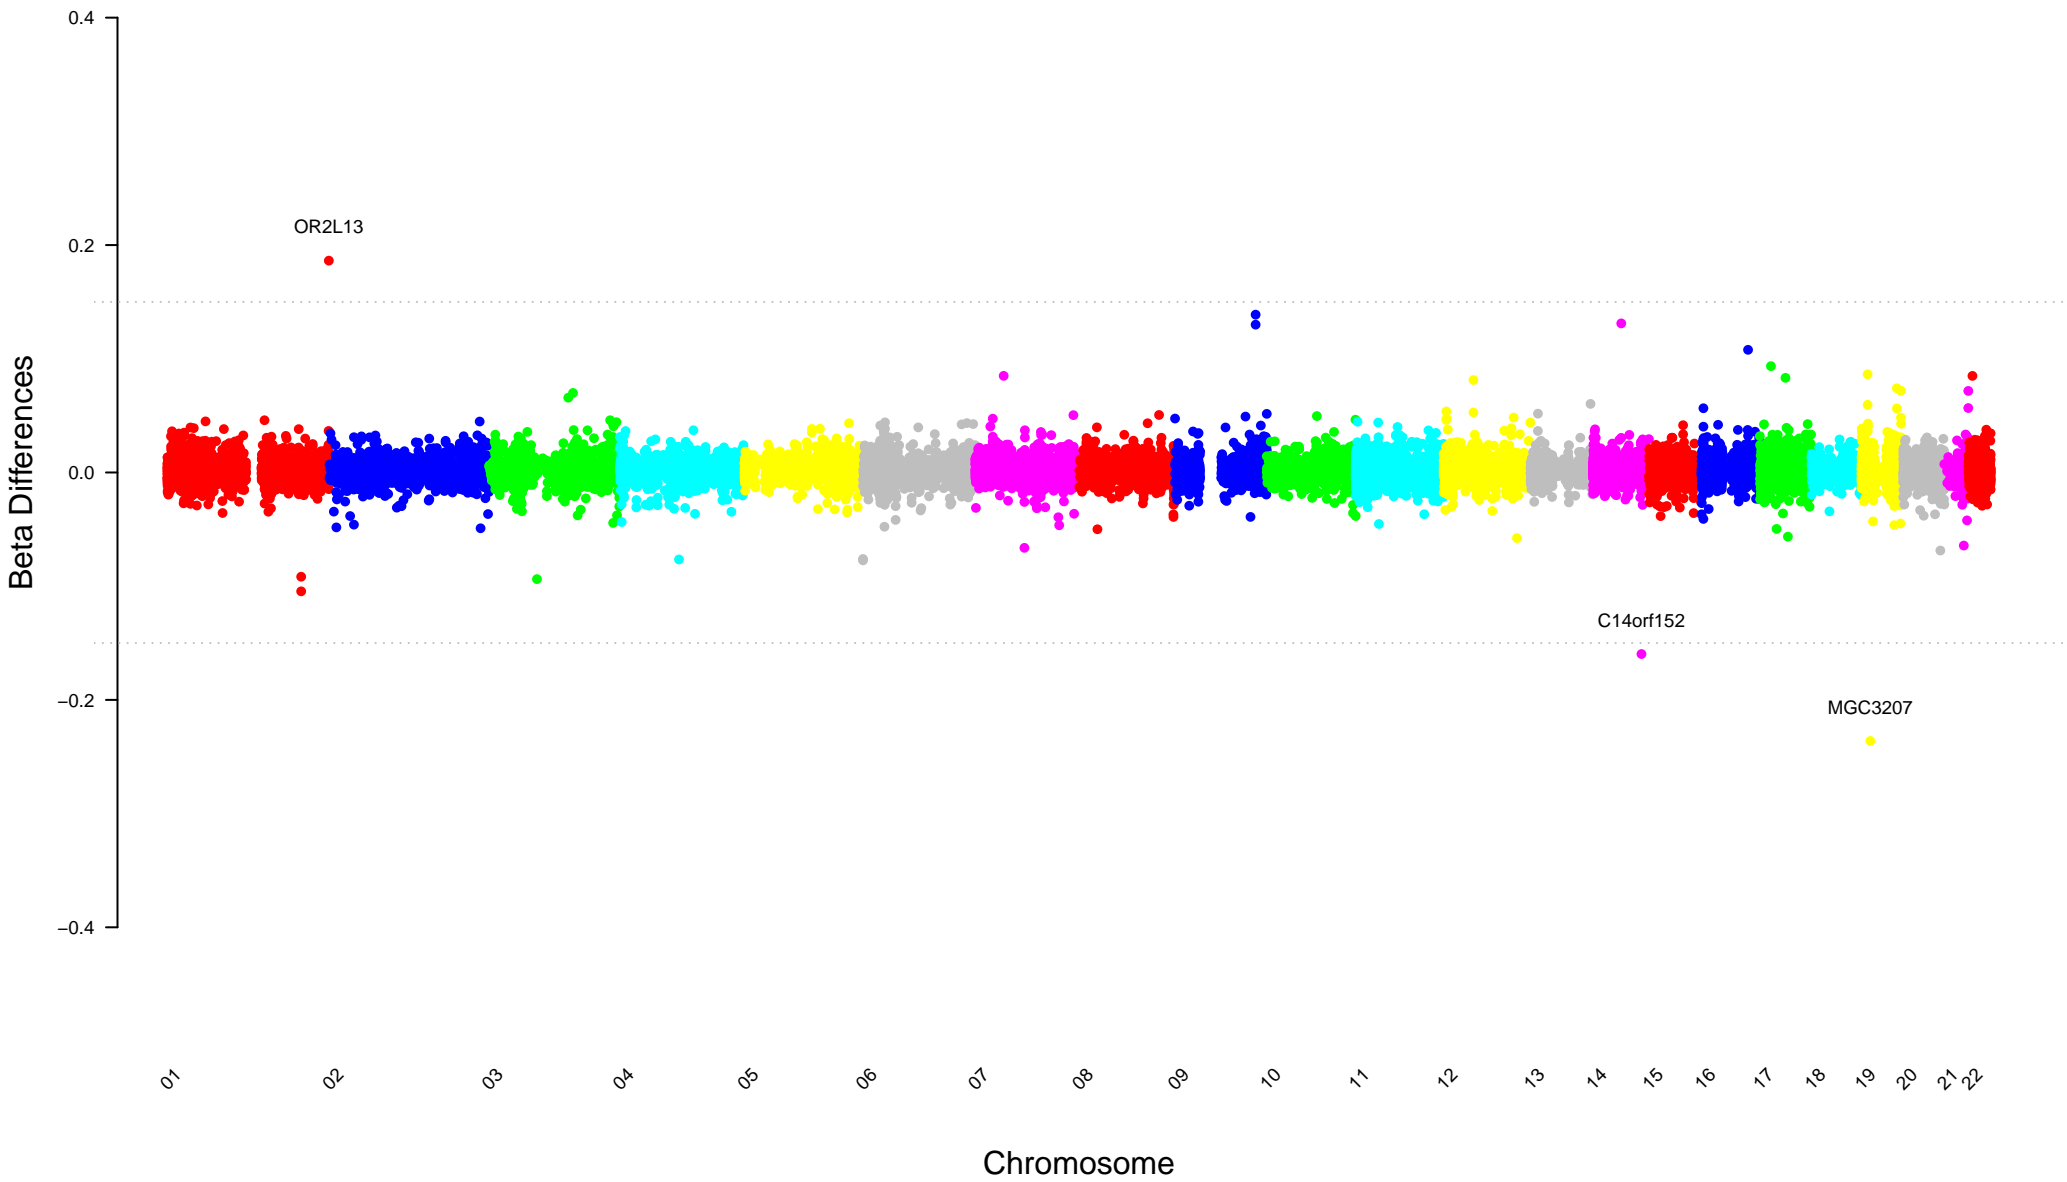

Supplement: mp201341x20.pdf [file mp201341x20.pdf]
